# Supplementary material for: Ostracod Fauna: Eyewitness to Fifty Years of Anthropic Impact in the Gulf of Trieste. A Potential Key to the Future Evolution of Urban Ecosystems
Source: Preprints.org preprint supplement (doi:10.20944/preprints202007.0624.v1), 2020-07-25
Supplement: Supplementary file 1 [file Table_1.xlsx]

## Sheet: Foglio1
					Table 1. Diversity indices (species diversity, Shannon–Weaver) calculated for benthic living ostracods in each sample.
					Samples	Taxa_S	Individuals	Shannon_H
					TG2004-1	13	41	2.356
					TG2004-3	8	16	1.981
					TG2004-9	7	18	1.692
					TG2004-13	19	53	2.733
					TG2004-18	14	57	2.152
					TG2004-21	14	110	1.855
					TG2004-25	14	56	2.243
					RM2004-1	8	16	1.646
					RM2004-2	9	45	1.521
					RM2004-3	11	76	2.05
					RM2004-4	11	84	1.957
					RM2004-5	5	6	1.733
					RM2004-6	14	69	1.619
					RM2004-7	6	44	1.199
					RM2004-8	6	38	1.517
					RM2004-9	14	64	1.946
					RM2004-10	13	96	1.835
					RM2004-11	11	99	1.943
					RM2004-12	10	108	1.923
					RM2004-13	8	26	1.815
					RM2004-14	7	55	1.689
					RM2004-15	6	19	1.516
					RM2004-16	11	77	2.008
					RM2004-17	5	21	1.357
					RM2004-18	10	76	1.317
					RM2004-19	9	68	1.319
					RM2004-20	10	93	1.791
					DSC2017-01	6	9	1.677
					DSC2017-07	5	41	1.002
					DSC2017-10	7	8	1.906
					DSC2017-12	7	61	1.233
					DSC2017-13	8	31	1.325
					DSC2017-16	7	26	1.336
					DSC2017-17	5	13	1.378
					DSC2017-18	3	9	0.6837
					DSC2017-19	4	15	0.7203
					DSC2017-20	4	7	1.277
					DSC2017-21	3	4	1.04
					DSC2017-25	8	24	1.735
					DSC2017-32	4	4	1.386
					DSC2017-34	6	18	1.442
					DSC2017-38	1	1	0
					DSC2017-39	1	1	0
					RM2013-1	13	58	2.02
