# Supplementary material for: Ostracod Fauna: Eyewitness to Fifty Years of Anthropic Impact in the Gulf of Trieste. A Potential Key to the Future Evolution of Urban Ecosystems
Source: Preprints.org preprint supplement (doi:10.20944/preprints202007.0624.v1), 2020-07-25
Supplement: Supplementary file 2 [file Table_2.xlsx]

## Sheet: Foglio1
								Table 2. Similarity percentage (SIMPER) analysis for ostracod assemblages defined with Q-mode cluster analysis. Overall average dissimilarity: 79.17.
								Species	Av. dissim	Contrib. %	Cumulative %	Cluster 1	Cluster 2	Cluster 3
								Semicytherura incongruens	19.31	24.4	24.4	5.73	63.3	22.9
								Aurila convexa	7.846	9.91	34.31	18.2	1.65	3.17
								Cytheridea neapolitana	7.837	9.899	44.21	4.27	4.28	25.4
								Loxoconcha ovulata	6.807	8.598	52.8	17.9	4.15	1.75
								Xestoleberis communis	6.595	8.33	61.13	16	1.04	0.104
								Leptocythere ramosa	5.393	6.813	67.95	8.36	3.6	13
								Pterygocythereis jonesi	2.989	3.776	71.72	0.0788	2.68	8.73
								Carinocythereis whitei	2.81	3.549	75.27	0.683	3.05	8.55
								Loxoconcha rhomboidea	2.152	2.718	77.99	4.22	2.29	0
								Xestoleberis dispar	1.853	2.341	80.33	4.27	0.372	1.06
								Pseudopsammocythere similis	1.786	2.256	82.59	1.13	2.03	4.61
								Cistacythereis turbida	1.354	1.71	84.3	0.458	1.9	3.07
								Leptocythere bacescoi	1.205	1.522	85.82	0	3.2	1.18
								Cytheroma variabilis	1.187	1.499	87.32	0.075	0.28	3.83
								Loxoconcha affinis	1.127	1.423	88.74	2.29	0.77	0
								Callistocythere adriatica	1.121	1.416	90.16	2.54	0	0.46
								Semicytherura rarecostata	1.073	1.355	91.51	2.13	0.98	0
								Cytherois triangularis	0.9531	1.204	92.72	2.3	0	0
								Leptocythere fabaeformis	0.8775	1.108	93.82	2.12	0	0
								Propontocypris dispar	0.6397	0.8081	94.63	1.19	0.292	0.26
								Palmoconcha turbida	0.6127	0.7739	95.41	0.117	1.96	0
								Loxoconcha stellifera	0.5097	0.6438	96.05	0.841	0.625	0
								Callistocythere sp.	0.4395	0.5552	96.61	0.0792	1.09	0.34
								Sclerochilus contortus contortus	0.431	0.5445	97.15	1.04	0	0
								Carinocythereis carinata	0.3448	0.4356	97.59	0.833	0	0
								Palmoconcha subrugosa	0.2819	0.3561	97.94	0.681	0	0
								Costa edwardsi	0.2633	0.3326	98.27	0.075	0	0.82
								Triebelina raripila	0.2496	0.3153	98.59	0.359	0.301	0.104
								Aurila fallax	0.1983	0.2504	98.84	0.479	0	0
								Paradoxostoma triste	0.1268	0.1602	99	0.307	0	0
								Aglaiocypris sp.	0.0965	0.1219	99.12	0.233	0	0
								Semicytherura sulcata	0.09584	0.1211	99.24	0.232	0	0
								Microcythere depressa	0.09347	0.1181	99.36	0	0.156	0.172
								Eucythere curta	0.07917	0.1	99.46	0.191	0	0
								Paradoxostoma acuminatum	0.07189	0.09081	99.55	0.174	0	0
								Semicytherura inversa	0.06498	0.08208	99.63	0.157	0	0
								Carinocythereis antiquata	0.06388	0.08069	99.72	0.0375	0	0.17
								Microcythere gibba	0.05044	0.06371	99.78	0	0	0.172
								Propontocypris pirifera	0.05044	0.06371	99.84	0	0	0.172
								Paracytheridea depressa	0.03152	0.03981	99.88	0.0758	0	0
								Cyprideis torosa	0.03117	0.03938	99.92	0.075	0	0
								Cytherois frequens	0.03101	0.03916	99.96	0.075	0	0
								Pontocypris acuminata	0.03084	0.03895	100	0.0746	0	0
