# Supplementary material for: Ostracod Fauna: Eyewitness to Fifty Years of Anthropic Impact in the Gulf of Trieste. A Potential Key to the Future Evolution of Urban Ecosystems
Source: Preprints.org preprint supplement (doi:10.20944/preprints202007.0624.v1), 2020-07-25
Supplement: Supplementary file 3 [file Table_3.xlsx]

## Sheet: Table 4
			Table 3 Univariate statistic for chemico-physical parameters.
		2004-2005	T (°C)	S	Chl a	O2 (%)	N-NO2	N-NH4	N-NO3	P-PO4	Si-SiO2	TN	TP
		N	117	117	117	117	112	114	117	116	117	117	117
		Min	5.985	28.71	82.9	0.1	0.01	0.01	0.01	0.01	0.15	5.11	0.17
		Max	26.841	38.43	112.3	2	1.56	2	22.88	0.19	12.13	34.25	4.49
		Mean	14.5092	36.965	98.3389	0.587094	0.400714	0.738509	3.09718	0.0681897	3.20419	12.7543	0.818547
		Stand. dev	5.79884	1.62301	6.09279	0.452457	0.450563	0.444561	3.92264	0.0423156	2.29982	5.6572	0.631972
		Median	13.569	37.44	98.1	0.5	0.21	0.71	1.9	0.06	2.6	11.17	0.66
		25 prcntil	9.2325	36.805	93.7	0.2	0.0725	0.36	0.69	0.04	1.48	9.175	0.53
		75 prcntil	18.488	37.91	103.5	0.8	0.5275	1.0425	4.21	0.09	4.415	14.575	0.93
		2013-2017	T (°C)	S	Chl a	O2 (%)	N-NO2	N-NH4	N-NO3	P-PO4	Si-SiO2	TN	TP
		N	23	23	23	22	23	23	23	21	22	23	21
		Min	11.8	9	0.1	86	0.02	0.05	0.77	0.01	0	0	0
		Max	20.5	37.8	2.47	117	1.71	5.81	59	0.32	83.25	74.86	0.4
		Mean	15.6826	35.1913	0.972174	97.8227	0.55913	1.39783	6.58	0.0890476	10.8395	17.8048	0.0995238
		Stand. dev	2.64947	5.99878	0.615075	7.36775	0.578469	1.50746	12.1584	0.0981787	17.3542	16.4424	0.0810232
		Median	15.7	37.1	1.03	97.8	0.3	0.9	2.86	0.04	6.84	11	0.08
		25 prcntil	13.6	36.5	0.4	93.475	0.07	0.42	1.76	0.025	2.34	9.04	0.055
		75 prcntil	17.5	37.4	1.32	101	1.18	1.53	5.25	0.115	12.315	23.57	0.125
