# Supplementary material for: Ostracod Fauna: Eyewitness to Fifty Years of Anthropic Impact in the Gulf of Trieste. A Potential Key to the Future Evolution of Urban Ecosystems
Source: Preprints.org preprint supplement (doi:10.20944/preprints202007.0624.v1), 2020-07-25
Supplement: Supplementary file 4 [file Table_S1.xlsx]

## Sheet: Foglio1
	Table S1. List of recognized living ostracod species (%) recovered in GoT during 2004-2017. x indicates the species found by Masoli, 1967.
	Samples	GT1967-22	GT1967-23	GT1967-24	GT1967-25	GT1967-26	GT1967-27	GT1967-28	GT1967-29	GT1967-30	GT1967-31	GT1967-32	GT1967-33	GT1967-34	GT1967-35	GT1967-36	GT1967-39	GT1967-40	GT1967-41	GT1967-42	GT1967-43	GT1967-44	GT1967-46	GT1967-47	GT1967-60	TG2004-1	TG2004-3	TG2004-9	TG2004-13	TG2004-18	TG2004-21	TG2004-25	RM2004-1	RM2004-2	RM2004-3	RM2004-4	RM2004-5	RM2004-6	RM2004-7	RM2004-8	RM2004-9	RM2004-10	RM2004-11	RM2004-12	RM2004-13	RM2004-14	RM2004-15	RM2004-16	RM2004-17
	Year	1967	1967	1967	1967	1967	1967	1967	1967	1967	1967	1967	1967	1967	1967	1967	1967	1967	1967	1967	1967	1967	1967	1967	1967	2004	2004	2004	2004	2004	2004	2004	2004	2004	2004	2004	2004	2004	2004	2004	2004	2004	2004	2004	2004	2004	2004	2004	2004
	Lat. N	45.7189	45.7166	45.7156	45.7124	45.7078	45.7057	45.7036	45.7018	45.6995	45.6962	45.6956	45.6927	45.6899	45.6891	45.6817	45.7289	45.7147	45.7199	45.7075	45.6945	45.6823	45.6993	45.6853	45.708	45.7183	45.7158	45.7169	45.7139	45.7178	45.7144	45.7167	45.7006	45.6994	45.6985	45.6961	45.7015	45.7002	45.699	45.6977	45.7021	45.7016	45.6998	45.698	45.6867	45.703	45.7082	45.7076	45.7047
	Lon. E	13.6925	13.697	13.6994	13.7048	13.7072	13.7084	13.7089	13.7103	13.7142	13.7203	13.7259	13.7311	13.7364	13.738	13.7467	13.6055	13.6393	13.5652	13.577	13.5891	13.5998	13.6675	13.6893	13.6151	13.6322	13.6254	13.6282	13.6247	13.6292	13.6225	13.6297	13.7197	13.7196	13.7199	13.7195	13.7169	13.7163	13.7163	13.7151	13.7119	13.7113	13.71	13.7087	13.7112	13.7104	13.7086	13.7064	13.7105
	Aglaiocypris sp.																									0	0	5.55556	0	0	0	0	0	0	0	0	0	0	0	0	0	0	0	0	0	0	0	0	0
	Aurila convexa (Baird, 1850)																	x	x	x	x	x	x	x		14.6341	0	0	0	0	0	0	6.25	0	0	0	12.5	1.44928	0	21.0526	4.6875	1.04167	1.0101	5.55556	34.6154	0	0	1.2987	4.7619
	Aurila fallax Ruggieri, 1984																									0	0	0	3.77358	0	0	0	0	0	0	0	0	0	0	0	0	0	0	0	7.69231	0	0	0	0
	Callistocythere sp.																									0	0	0	1.88679	0	0	0	0	0	0	0	0	0	0	0	10.9375	0	0	0	0	0	0	0	0
	Callistocythere adriatica Masoli, 1968	x	x	x	x	x	x	x	x	x	x	x	x	x	x	x	x	x	x	x	x	x	x	x	x	2.43902	0	5.55556	9.43396	1.75439	5.45455	5.35714	0	0	0	1.19048	0	0	0	0	0	0	0	0	0	0	0	0	0
	Callistocythere flavidofusca (Ruggieri, 1950) Kurc, 1961	x	x	x	x	x	x	x	x	x	x	x	x	x	x	x	x	x	x	x	x	x	x	x	x
	Carinocythereis antiquata (Baird, 1850)																									0	0	0	0	0	0.909091	0	0	0	0	0	0	0	0	0	0	0	0	0	0	0	0	0	0
	Carinocythereis carinata (Roemer, 1838) †	x	x	x	x	x	x	x	x	x	x	x	x	x	x	x	x	x	x	x	x	x	x	x	x	0	0	0	0	0	0	0	0	0	0	0	0	0	0	0	0	0	0	0	0	0	0	0	0
	Carinocythereis whitei (Baird, 1850)																									0	0	0	1.88679	1.75439	7.27273	5.35714	0	4.44444	7.89474	7.14286	0	5.7971	2.27273	15.7895	4.6875	7.29167	6.06061	8.33333	0	3.63636	0	6.49351	0
	Cistacythereis turbida (G. W. Müller, 1894)																									0	0	0	3.77358	0	3.63636	3.57143	0	2.22222	3.94737	3.57143	0	1.44928	0	7.89474	14.0625	3.125	2.0202	2.77778	0	0	0	5.19481	0
	Costa edwardsi (Roemer, 1838)																									0	0	0	0	1.75439	0	0	0	0	0	1.19048	0	0	0	0	0	0	0	0	0	0	5.26316	0	0
	Cushmanidea elongata (Brady, 1868) Puri, 1958	x	x	x	x	x	x	x	x	x	x	x	x	x	x	x	x	x	x	x	x	x	x	x	x
	Cyprideis torosa (Jones, 1850)	x	x	x	x	x	x	x	x	x	x	x	x	x	x	x		x			x	x	x	x	x	0	0	0	0	0	1.81818	0	0	0	0	0	0	0	0	0	0	0	0	0	0	0	0	0	0
	Cytheretta subradiosa (Roemer, 1838)																						x	x
	Cytheridea neapolitana Kollmann, 1958	x	x	x	x	x	x	x	x	x	x	x	x	x	x	x	x	x	x	x	x	x	x	x	x	7.31707	6.25	0	11.3208	14.0351	20.9091	17.8571	0	2.22222	15.7895	28.5714	0	1.44928	31.8182	42.1053	0	10.4167	22.2222	38.8889	0	0	36.8421	19.4805	0
	Cytherois frequens Mueller, 1894																									0	0	0	0	1.75439	0	0	0	0	0	0	0	0	0	0	0	0	0	0	0	0	0	0	0
	Cytherois triangularis Bonaduce, Masoli, Minichelli & Pugliese, 1979																									4.87805	18.75	27.7778	3.77358	0	0	0	0	0	0	0	0	0	0	0	0	0	0	0	0	0	0	0	0
	Cytheroma variabilis G. W. Müller, 1894																									0	0	0	0	1.75439	0	0	0	0	1.31579	0	0	0	0	0	0	0	9.09091	5.55556	0	0	0	9.09091	0
	Eucythere curta Ruggieri, 1975																									0	0	0	1.88679	0	0.909091	1.78571	0	0	0	0	0	0	0	0	0	0	0	0	0	0	0	0	0
	Hiltermannicythere turbida (Müller, 1894)																x	x	x	x	x	x	x	x	x
	Leptocythere bacescoi (Rome, 1942)																									0	0	0	0	0	0	0	0	8.88889	2.63158	0	0	7.24638	0	0	3.125	2.08333	0	0	0	12.7273	0	3.8961	0
	Leptocythere fabaeformis (Müller, 1894)																									2.43902	18.75	0	7.54717	14.0351	4.54545	3.57143	0	0	0	0	0	0	0	0	0	0	0	0	0	0	0	0	0
	Leptocythere multipunctata (Seguenza, 1883)	x	x	x	x	x	x	x	x	x	x	x	x	x	x	x
	Leptocythere ramosa (Rome, 1942)																									4.87805	18.75	5.55556	5.66038	17.5439	43.6364	25	0	4.44444	14.4737	21.4286	0	0	0	0	6.25	29.1667	15.1515	15.7407	0	12.7273	0	19.4805	0
	Loxoconcha affinis (Brady, 1866)																									7.31707	0	0	0	3.50877	0	0	6.25	0	0	0	25	1.44928	0	0	0	0	0	0	19.2308	0	0	0	0
	Loxoconcha avellana (Brady, 1866) Brady, 1880	x	x	x	x	x	x	x	x	x	x	x	x	x	x	x
	Loxoconcha ovulata (O.G. Costa, 1853)																									4.87805	12.5	33.3333	15.0943	26.3158	2.72727	17.8571	12.5	0	3.94737	1.19048	12.5	7.24638	4.54545	0	1.5625	3.125	1.0101	1.85185	7.69231	7.27273	5.26316	0	38.0952
	Loxoconcha rhomboidea (Fischer, 1855)																x	x	x	x	x	x	x	x	x	9.7561	0	0	0	8.77193	0	5.35714	0	0	0	0	0	0	0	0	0	0	0	0	0	16.3636	0	0	0
	Loxoconcha stellifera Müller 1894																x	x	x	x	x	x	x	x	x	0	0	0	0	0	0	0	6.25	0	0	0	12.5	0	0	0	0	0	0	0	7.69231	0	0	0	0
	Palmoconcha subrugosa (Ruggieri, 1977) Maybury, 1991 †																									0	0	0	0	0	0	0	0	0	0	0	0	0	0	0	0	0	0	0	0	0	0	0	0
	Loxoconcha tumida Brady, 1869	x	x	x	x	x	x	x	x	x	x	x	x	x	x	x	x	x	x	x	x	x	x	x	x
	Microcythere depressa Müller, 1894																									0	0	0	0	0	0	0	0	0	0	0	0	0	0	0	1.5625	0	0	0	0	0	0	0	0
	Microcythere gibba Müller, 1894																									0	0	0	0	0	0	0	0	0	0	0	0	0	0	0	0	0	0	0	0	0	0	0	0
	Palmoconcha turbida (G. W. Müller, 1912)	x	x	x	x	x	x	x	x	x	x	x	x	x	x	x	x	x	x	x	x	x	x	x	x	0	0	0	1.88679	0	0.909091	0	6.25	13.3333	0	0	0	0	0	0	0	0	0	0	0	0	0	0	0
	Paracytheridea depressa Müller, 1894	x	x	x	x	x	x	x	x	x	x	x	x	x	x	x	x	x	x	x	x	x	x	x	x	0	0	0	0	0	1.81818	0	0	0	0	0	0	0	0	0	0	0	0	0	0	0	0	0	0
	Paradoxostoma acuminatum Müller, 1894																									0	0	0	0	0	0	0	0	0	0	0	0	0	0	0	0	0	0	0	0	0	0	0	0
	Pseudopsammocythere similis (Müller, 1894) Carbonnel, 1969	x	x	x	x	x	x	x	x	x	x	x	x	x	x	x										0	0	0	3.77358	0	0	1.78571	0	2.22222	2.63158	7.14286	0	4.34783	6.81818	0	1.5625	2.08333	6.06061	6.48148	0	0	10.5263	2.5974	0
	Paradoxostoma triste Müller, 1894																									0	0	0	0	3.50877	0	0	0	0	0	0	0	0	0	0	0	0	0	0	3.84615	0	0	0	0
	Pontocypris acuminata (Müller, 1894)																									0	0	0	0	0	0	1.78571	0	0	0	0	0	0	0	0	0	0	0	0	0	0	0	0	0
	Propontocypris dispar (Müller, 1894)																									0	0	0	0	0	0	0	0	0	0	0	0	1.44928	0	0	0	0	0	0	0	0	0	2.5974	28.5714
	Propontocypris pirifera (G. W. Müller, 1894)																									0	0	0	0	0	0	0	0	0	0	0	0	0	0	0	0	0	0	0	0	0	0	0	0
	Pseudopsammocythere similis (Müller, 1894) Carbonnel, 1969	x	x	x	x	x	x	x	x	x	x	x	x	x	x	x										2.43902	0	0	0	0	0.909091	0	0	0	0	0	0	1.44928	0	0	0	2.08333	0	0	0	0	0	0	0
	Pterygocythereis jonesi (Baird, 1850)	x	x	x	x	x	x	x	x	x	x	x	x	x	x	x	x	x	x	x	x	x	x	x	x	0	0	0	1.88679	0	0	0	6.25	0	15.7895	7.14286	0	4.34783	0	2.63158	1.5625	0	7.07071	7.40741	0	7.27273	31.5789	2.5974	0
	Sclerochilus contortus contortus (Norman, 1862)																									0	0	0	0	0	0	0	0	0	0	0	25	0	0	0	0	0	0	0	0	0	0	0	0
	Schedopontocypris setosa (Müller, 1894)																x	x	x	x	x	x	x	x	x
	Semicytherura incongruens (Müller, 1894) Ruggieri, 1959	x	x	x	x	x	x	x	x	x	x	x	x	x	x	x		x	x	x	x	x		x	x	0	12.5	0	5.66038	0	0	0	50	55.5556	27.6316	17.8571	0	59.4203	52.2727	10.5263	43.75	35.4167	29.2929	7.40741	15.3846	40	10.5263	27.2727	23.8095
	Semicytherura inversa (Seguenza, 1880)																								x	0	0	0	3.77358	0	0	0	0	0	0	0	0	0	0	0	0	0	0	0	0	0	0	0	0
	Semicytherura rarecostata Bonaduce, Ciampo & Masoli, 1976																									17.0732	6.25	11.1111	7.54717	1.75439	0	3.57143	0	6.66667	0	0	0	0	0	0	3.125	0	0	0	0	0	0	0	0
	Semicytherura sulcata (Müller, 1894)																								x	0	0	0	0	0	0	0	0	0	0	0	0	0	0	0	0	0	0	0	0	0	0	0	0
	Triebelina raripila (Müller, 1894)																									0	0	0	0	0	0	0	0	0	0	0	0	1.44928	0	0	1.5625	1.04167	0	0	3.84615	0	0	0	4.7619
	Xestoleberis communis G. W. Müller, 1894	x	x	x	x	x	x	x	x	x	x	x	x	x	x	x	x	x	x	x	x	x	x	x	x	17.0732	6.25	11.1111	7.54717	1.75439	0	3.57143	6.25	0	0	0	12.5	0	0	0	1.5625	1.04167	0	0	0	0	0	0	0
	Xestoleberis dispar G. W. Müller, 1894	x	x	x	x	x	x	x	x	x	x	x	x	x	x	x	x	x	x	x	x	x	x	x	x	4.87805	0	0	1.88679	0	4.54545	3.57143	0	0	3.94737	3.57143	0	1.44928	2.27273	0	0	2.08333	1.0101	0	0	0	0	0	0
[truncated: 20 more columns]

## Sheet: Foglio2
Samples/year		GT1967-22	GT1967-23	GT1967-24	GT1967-25	GT1967-26	GT1967-27	GT1967-28	GT1967-29	GT1967-30	GT1967-31	GT1967-32	GT1967-33	GT1967-34	GT1967-35	GT1967-36	GT1967-39	GT1967-40	GT1967-41	GT1967-42	GT1967-43	GT1967-44	GT1967-46	GT1967-47	GT1967-50	GT1967-56	GT1967-57	GT1967-58	GT1967-60
Group		1967	1967	1967	1967	1967	1967	1967	1967	1967	1967	1967	1967	1967	1967	1967	1967	1967	1967	1967	1967	1967	1967	1967	1967	1967	1967	1967	1967
Lat.		45.7189	45.7166	45.7156	45.7124	45.7078	45.7057	45.7036	45.7018	45.6995	45.6962	45.6956	45.6927	45.6899	45.6891	45.6817	45.7289	45.7147	45.7199	45.7075	45.6945	45.6823	45.6993	45.6853	45.6553	45.6214	45.6361	45.6131	45.708
lon.		13.6925	13.697	13.6994	13.7048	13.7072	13.7084	13.7089	13.7103	13.7142	13.7203	13.7259	13.7311	13.7364	13.738	13.7467	13.6055	13.6393	13.5652	13.577	13.5891	13.5998	13.6675	13.6893	13.7495	13.5072	13.511	13.52	13.6151
Aurila convexa (Baird, 1850)	sp1																	x	x	x	x	x	x	x	x	x	x
Callistocythere adriatica Masoli, 1968	sp2	x	x	x	x	x	x	x	x	x	x	x	x	x	x	x	x	x	x	x	x	x	x	x	x	x	x	x	x
Callistocythere flavidofusca (Ruggieri, 1950) Kurc, 1961	sp3	x	x	x	x	x	x	x	x	x	x	x	x	x	x	x	x	x	x	x	x	x	x	x	x	x	x	x	x
Carinocythereis carinata (Roemer, 1838) †	sp4	x	x	x	x	x	x	x	x	x	x	x	x	x	x	x	x	x	x	x	x	x	x	x	x	x	x	x	x
Cushmanidea elongata (Brady, 1868) Puri, 1958	sp5	x	x	x	x	x	x	x	x	x	x	x	x	x	x	x	x	x	x	x	x	x	x	x	x	x	x	x	x
Cyprideis torosa (Jones, 1850)	sp6	x	x	x	x	x	x	x	x	x	x	x	x	x	x	x		x			x	x	x	x		x	x	x	x
Cytheretta subradiosa (Roemer, 1838)	sp7																						x	x	x	x	x	x
Cytheridea neapolitana Kollmann, 1958	sp8	x	x	x	x	x	x	x	x	x	x	x	x	x	x	x	x	x	x	x	x	x	x	x	x	x	x	x	x
Hiltermannicythere turbida (Mueller, 1894)	sp9																x	x	x	x	x	x	x	x	x	x	x	x	x
Leptocythere multipunctata (Seguenza, 1883)	sp10	x	x	x	x	x	x	x	x	x	x	x	x	x	x	x
Leptocythere ramosa (Rome, 1942)	sp11
Loxoconcha avellana (Brady, 1866) Brady, 1880	sp12	x	x	x	x	x	x	x	x	x	x	x	x	x	x	x
Loxoconcha rhomboidea (Fischer, 1855)	sp13																x	x	x	x	x	x	x	x	x	x	x	x	x
Loxoconcha stellifera Mueller, 1894	sp14																x	x	x	x	x	x	x	x	x	x	x	x	x
Loxoconcha tumida Brady, 1869	sp15	x	x	x	x	x	x	x	x	x	x	x	x	x	x	x	x	x	x	x	x	x	x	x	x	x	x	x	x
Palmoconcha turbida (G. W. Müller, 1912)	sp16	x	x	x	x	x	x	x	x	x	x	x	x	x	x	x	x	x	x	x	x	x	x	x	x	x	x	x	x
Paracytheridea depressa Mueller, 1894	sp17	x	x	x	x	x	x	x	x	x	x	x	x	x	x	x	x	x	x	x	x	x	x	x	x	x	x	x	x
Pseudopsammocythere similis (Mueller, 1894) Carbonnel, 1969	sp18	x	x	x	x	x	x	x	x	x	x	x	x	x	x	x
Pseudopsammocythere similis (Mueller, 1894) Carbonnel, 1969	sp19	x	x	x	x	x	x	x	x	x	x	x	x	x	x	x
Pterygocythereis jonesi (Baird, 1850)	sp20	x	x	x	x	x	x	x	x	x	x	x	x	x	x	x	x	x	x	x	x	x	x	x	x	x	x	x	x
Schedopontocypris setosa (Mueller, 1894)	sp21																x	x	x	x	x	x	x	x	x	x	x	x	x
Semicytherura incongruens (Mueller, 1894) Ruggieri, 1959	sp22	x	x	x	x	x	x	x	x	x	x	x	x	x	x	x		x	x	x	x	x		x	x	x	x	x	x
Semicytherura inversa (Seguenza, 1880)	sp23																									x	x	x	x
Semicytherura sulcata (Mueller, 1894)	sp24																												x
Xestoleberis communis G. W. Müller, 1894	sp25	x	x	x	x	x	x	x	x	x	x	x	x	x	x	x	x	x	x	x	x	x	x	x	x	x	x	x	x
Xestoleberis disparG. W. Müller, 1894	sp26	x	x	x	x	x	x	x	x	x	x	x	x	x	x	x	x	x	x	x	x	x	x	x	x	x	x	x	x
Callistocythere flavidofusca (Ruggieri, 1950) Kurc, 1961
Cushmanidea elongata (Brady, 1868) Puri, 1958
Cytheretta subradiosa (Roemer, 1838)
Hiltermannicythere turbida (Mueller, 1894)
Leptocythere multipunctata (Seguenza, 1883)
Loxoconcha avellana (Brady, 1866) Brady, 1880
Loxoconcha tumida Brady, 1869
Schedopontocypris setosa (Mueller, 1894)
